# Age-dependent Pavlovian biases influence motor decision-making

*Xiuli Chen<sup>1</sup>, Robb B. Rutledge<sup>2, 3</sup>, Harriet R. Brown<sup>3</sup>, Raymond J. Dolan<sup>2, 3</sup>,  
Sven Bestmann<sup>3, 4\*</sup>, Joseph M. Galea<sup>1\*</sup>*

\* Authors contributed equally

<sup>1</sup> School of Psychology, University of Birmingham, B15 2TT, UK

<sup>2</sup> Max Planck University College London Centre for Computational Psychiatry and Ageing Research, London, WC1B 5EH, UK

<sup>3</sup> Wellcome Centre for Human Neuroimaging, University College London, London, WC1N 3BG, UK

<sup>4</sup> Sobell Department of Motor Neuroscience and Movement Disorders, UCL Institute of Neurology, University College London, London, WC1N 3BG, UK

Corresponding authors:

Xiuli Chen

School of Psychology

University of Birmingham

B15 2TT, UK

Email: [xiuli.chen618@gmail.com](mailto:xiuli.chen618@gmail.com)

Joseph Galea

School of Psychology

University of Birmingham

B15 2TT, UK

Email: [j.galea@bham.ac.uk](mailto:j.galea@bham.ac.uk)

27 Healthy ageing is associated with decreased risk taking in motor<sup>1</sup> and economic<sup>2-4</sup> decision-making.  
28 However, it is unknown whether a single underlying mechanism explains these changes. Age-related  
29 changes in economic risk taking are explained by reduced Pavlovian biases that promote action toward  
30 reward<sup>2, 5, 6</sup>. Although Pavlovian biases also promote inaction in the face of punishment, the role such  
31 Pavlovian biases play in motor decision-making, which additionally depends on estimating the probability of  
32 successfully executing an action<sup>7-10</sup>, is unknown. To address this, we developed a novel app-based motor  
33 decision-making task to measure sensitivity to reward and punishment when subjects (n=26,532) made a  
34 'go/no-go' motor gamble based on the perceived ability to execute a complex action. Using a newly  
35 established approach-avoidance computational model<sup>2, 6</sup>, we show motor decision-making is also subject to  
36 Pavlovian influences, and that healthy ageing is mainly associated with a reduction in Pavlovian bias toward  
37 reward. In a subset of participants playing an independent economic decision-making task (n=17,220), we  
38 demonstrate similar decision-making tendencies across motor and economic domains. Computational models  
39 that incorporate Pavlovian biases thus provide unifying accounts for motor and economic decision-making.

40  
41 Optimal decision-making requires choices that maximise reward and minimise punishment<sup>11</sup>. To achieve  
42 this, humans rely on two key mechanisms; a flexible, instrumental, value-dependent process, and a hard-  
43 wired, Pavlovian, value-independent process<sup>11-13</sup>. Economic decision-making is often described using  
44 parametric decision models based on prospect theory that operationalise instrumental (value-dependent)  
45 concepts such as risk and loss aversion<sup>14-17</sup>. However, it has recently been shown that Pavlovian biases,  
46 which promote action towards reward and inaction in the face of punishment irrespective of option value<sup>5, 11</sup>,  
47 <sup>18</sup>, help to explain aberrant choice behaviour. For instance, the best explanation for the diminished economic  
48 risk-taking observed in older adults is a reduction in dopamine-dependent Pavlovian attraction to potential  
49 reward<sup>2, 5</sup>, suggesting that Pavlovian processes play a key role in explaining age-related changes in economic  
50 decision-making.

51  
52 In contrast to economic decision-making, motor decision-making requires weighting potential rewards and  
53 punishments against the probability of successfully executing an action<sup>7, 19-21</sup>. Motor decision-making has  
54 primarily been explained in the context of instrumental-based processes<sup>1, 7-10, 22</sup>. Within this framework, older  
55 adults display reduced risk-seeking behaviour<sup>1</sup>. However, given recent findings in economic decision-  
56 making<sup>2</sup>, we asked whether Pavlovian biases might provide a more parsimonious explanation of age-related  
57 changes in motor decision-making. Although there is strong evidence that Pavlovian biases shape motor  
58 performance<sup>23-26</sup>, and that healthy ageing leads to a reduction in Pavlovian biases on motor performance<sup>27, 28</sup>,  
59 it is currently unknown whether Pavlovian biases influence motor decision-making. Sampling a large  
60 population through an app-based motor-decision game, we provide a novel demonstration that Pavlovian  
61 biases have a substantial impact on motor decisions, and are able to explain age-related changes in risk  
62 taking during motor decision-making.

63

64 We developed a novel app-based motor decision-making task that examined participant sensitivity to reward  
 65 (gaining points) and punishment (losing points) when making a ‘go/no-go’ decision based on their perceived  
 66 ability to successfully execute a motor action (Figure 1a, b). Using an app-based platform (‘How do you deal  
 67 with pressure?’ The Great Brain Experiment: [www.thegreatbrainexperiment.com](http://www.thegreatbrainexperiment.com))<sup>18, 29, 30</sup>, we obtained data  
 68 from a large cohort (n=26,532; 15,911 males) in which six age groups were considered: 18-24yrs: n=5889;  
 69 25-29yrs: n=4705; 30-39yrs: n=7333; 40-49yrs: n=4834; 50-59yrs: n=2452; and 60+yrs: n=1319 (Figure 1c;  
 70 see Supplementary Methods/ Figure S1)<sup>18, 29, 30</sup>.

71

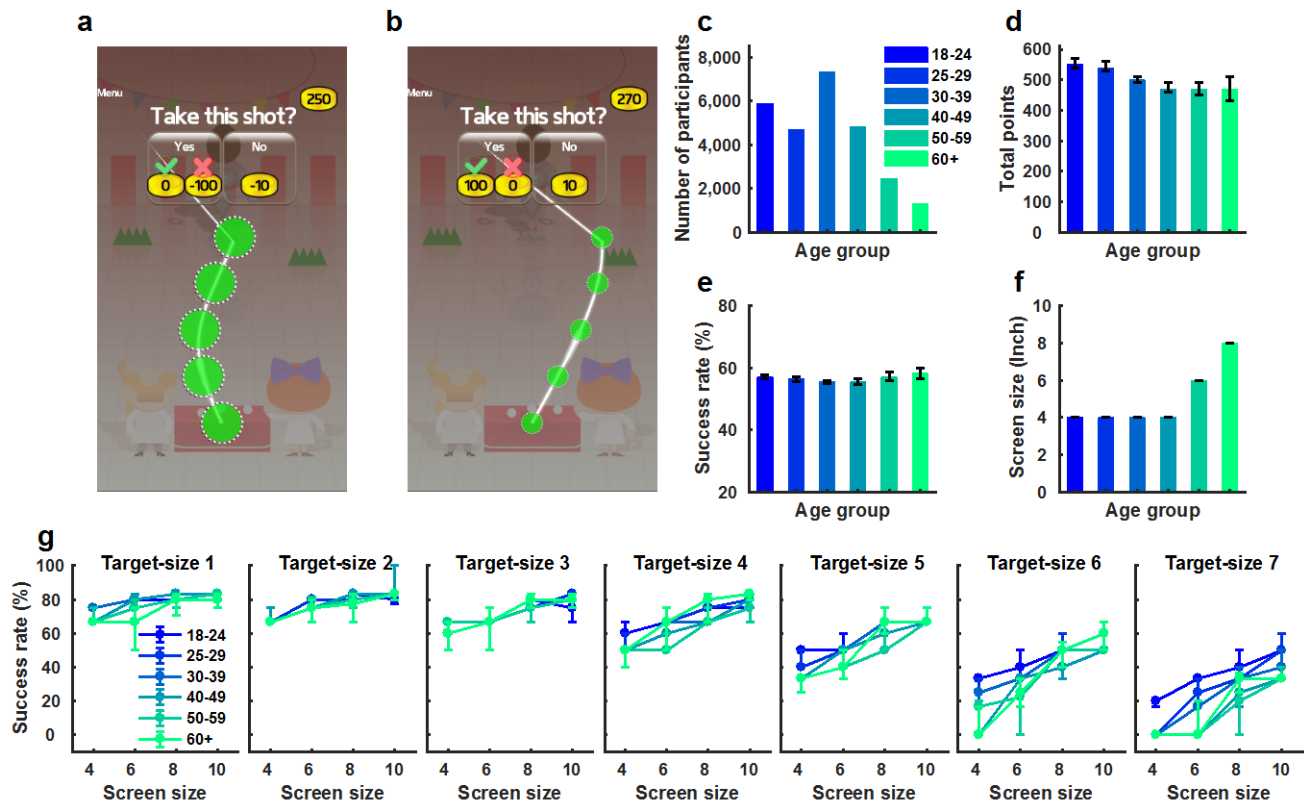

72

73 **Figure 1: Motor gamble task and overall performance.** (a) Game interface: an example of a punishment trial for  
 74 target-size 1 (1: largest target size; 7: smallest target size); Participants decided whether to skip the tapping task and  
 75 stick with a small punishment (-10 points) or gamble on successfully executing the action. If successful then they avoid  
 76 the punishment (lose 0 points); otherwise, they received a greater punishment (-100 points); (b) A reward trial for  
 77 target-size 7; (c) The number of participants in each age group; (d) Final points achieved across age groups; (e) The  
 78 overall success rate (%) for executing the tapping action across age groups; (f) The screen size (inches) of the devices  
 79 used across age groups; (g) Success rate (%) for executing the tapping action given the age, the screen size, and target-  
 80 size (1: largest target size; 7: smallest target size). Bars/Dots and error bars represent medians and bootstrapped  
 81 95% CIs.

82

83 The game required participants to sequentially tap 5 targets distributed along a pre-defined path that could  
 84 vary in both curvature and direction (Figure 1a, b; see Methods). If a participant accurately tapped all 5  
 85 targets successfully within 1.2 seconds, then the action was considered a success. There were 7 different  
 86 target sizes, with the task becoming progressively more difficult as target size decreased (Figure 1a, b; see  
 87 Methods). At the beginning of each trial, participants saw the required action and were asked whether they  
 88 wanted to take the motor gamble. There were two types of trials: reward and punishment. For reward trials,  
 89 participants had to decide whether to skip the trial and stick with a small reward (10 points) or gamble on

90 successfully executing the tapping action (Figure 1b). If successful they received a greater reward (20, 60 or  
91 100 points) or 0 points if they failed. For punishment trials, participants had to decide whether to skip the  
92 trial and stick with a small punishment (-10 points), or gamble on successfully executing the tapping action  
93 (Figure 1a). If successful, they lost nothing (lose 0 points) but failure resulted in a greater punishment (-20, -  
94 60 or -100 points). Participants began with 250 points and the overall goal was to accumulate as many points  
95 as possible. All trial-by-trial data (including tasks parameters, behavioural results, modelling results and  
96 accompanying code) are available on our open-access data depository (<https://osf.io/fu9be/>).

97  
98 We found that older adults won fewer total points than younger adults (Figure 1d;  $r=-0.047$ ,  $p<0.001$ ; all  $r$   
99 values represent a partial correlation between the measurement of interest and age, whilst controlling for the  
100 effects of gender and education;  $p$  values were computed by permutation test; see Methods). The final points  
101 accumulated during this task were dependent on (1) the decisions made (to gamble or not) and (2) the motor  
102 performance (success rate of executing the tapping action). Therefore, prior to examining participant choice  
103 behaviour it was crucial to determine whether motor performance differed across age groups.

104  
105 Although success on the motor task was similar across age groups (Figure 1e,  $r=0.006$ ,  $p=0.329$ ), older  
106 adults used devices with larger screen sizes than younger age groups (Figure 1f,  $r=0.279$ ,  $p<0.001$ ). As target  
107 size was scaled to device screen size (see Methods), we assessed how the relationship between age, target  
108 size and screen size affected motor performance. We found that decreased success rate was linked to a  
109 combination of smaller target sizes, smaller screen sizes and older age (Figure 1g, stepwise regression  
110 winning model:  $\text{success rate} = 1 - 0.003 * \text{age} * \text{target size} + 0.002 * \text{age} * \text{screen size} + 0.005 * \text{target size} * \text{screen}$   
111  $\text{size}$ ; all  $p<0.001$ ; Adjusted  $R^2=0.213$ ). Therefore, we next assessed choice behaviour in the context of how  
112 these factors influenced motor performance on a trial-by-trial basis.

113  
114 Participants were asked to make decisions between a gamble option and a certain option. Each option can be  
115 characterised by its potential outcomes, weighted by the probability of each outcome (i.e. Expected Value<sup>31</sup>).  
116 For the gamble option, the expected value is given by:  $EV_{\text{gamble}} = P_{\text{success}} V_{\text{success}} + (1 - P_{\text{success}}) V_{\text{failed}}$ , where  $P_{\text{success}}$   
117 is the probability of successfully executing the tapping action;  $V_{\text{success}}$  is the points received if successful;  
118  $V_{\text{failed}}$  is the points received on failure. The expected value of the certain option ( $EV_{\text{certain}}$ ) is  $V_{\text{certain}}$  and the  
119 probability of receiving this value is 1. We calculated  $P_{\text{success}}$  by estimating the probability of motor success  
120 based on a participant's age, screen size of the device used and target-size level (Figure 1g; see Methods). By  
121 comparing choice behaviour given the difference between these two options ( $EV_{\text{gamble}} - EV_{\text{certain}}$ ), we were  
122 then able to examine the influence of ageing on motor decisions while controlling for differences in motor  
123 performance due to age, screen size and target size. However, this formulation relied on an assumption that  
124 participants had a good estimate of their probability of success. To test whether this was true, we recruited an  
125 additional 60 participants (10 in each age group) who were asked to estimate their probability of success  
126 (from 0% to 100% in steps of 10%; see Methods) after being shown the target size and trajectory. After this  
127 estimate, they were then asked to perform the tapping action (whilst ignoring the decision-making part of the

128 game). Similar to previous work<sup>1, 7, 20</sup>, we found participants were able to reliably estimate the probability of  
129 motor success (Figure 2a), and this estimate did not differ across age groups (Figure 2b; one-way ANOVA:  
130  $F_{(5,54)}=0.859$ ,  $p=0.515$ ).  
131

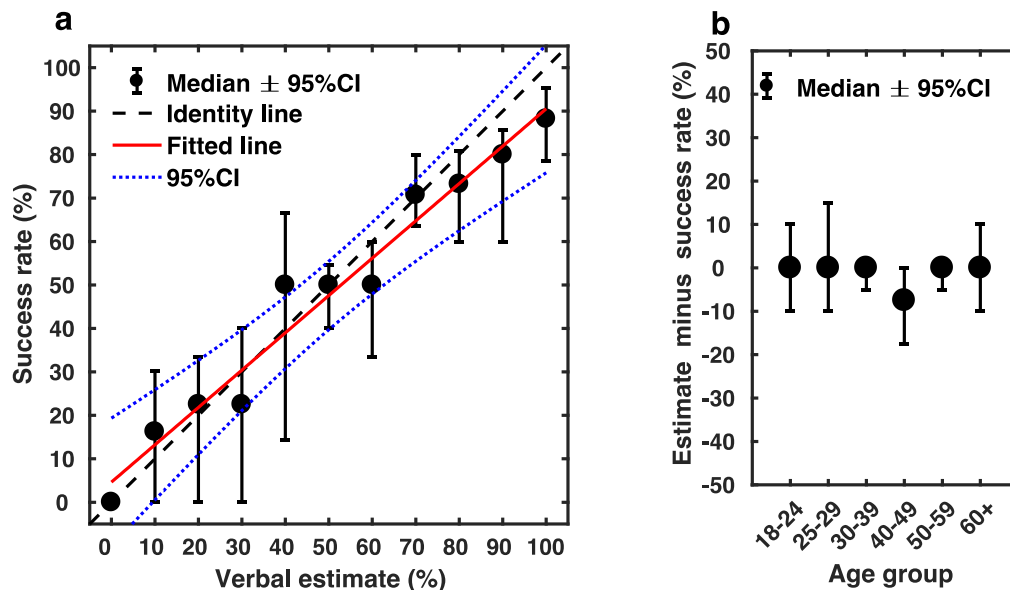

132  
133 **Figure 2: Participant ability to estimate motor performance success.** (a) For each participant ( $n=60$ ; 10 in each  
134 group), we calculated an average success rate for each available verbal estimate value (0% to 100% with 10%  
135 increment). Each black dot represents the median success rate (y-axis) across participants who gave that certain verbal  
136 estimate value (x-axis), and error bars represent bootstrapped 95% CI across participants; (b) The estimation error for  
137 each age group. For each participant, estimation error was calculated as the median error (on each trial: estimate % -  
138 100% if successful, 0% if failed) across all trials. Black dots and error bars represent the medians and bootstrapped  
139 95% CIs.  
140

141 We found a significant decrease in the proportion of trials in which participants chose to gamble across the  
142 lifespan in reward trials (Figure 3a;  $r=-0.190$ ;  $p<0.001$ ), and to a lesser extent in punishment trials (Figure  
143 3b;  $r=-0.052$ ;  $p<0.001$ ). To understand these results, age-related changes in choice behaviour had to be  
144 examined given the difference between these two value options ( $EV_{\text{gamble}}-EV_{\text{certain}}$ ). Interestingly, in reward  
145 trials, there was a gradual and monotonic decrease in gamble rate across the lifespan which appeared  
146 independent of the  $EV_{\text{gamble}}-EV_{\text{certain}}$  value (right side of Figure 3c). In contrast, for punishment trials, older  
147 adults displayed a higher gamble rate during high risk gambles (e.g.,  $EV_{\text{gamble}}-EV_{\text{certain}}=-90$ ), but conversely a  
148 reduced gamble rate during low risk gambles (e.g., Figure 3c;  $EV_{\text{gamble}}-EV_{\text{certain}}=0$ ).

149

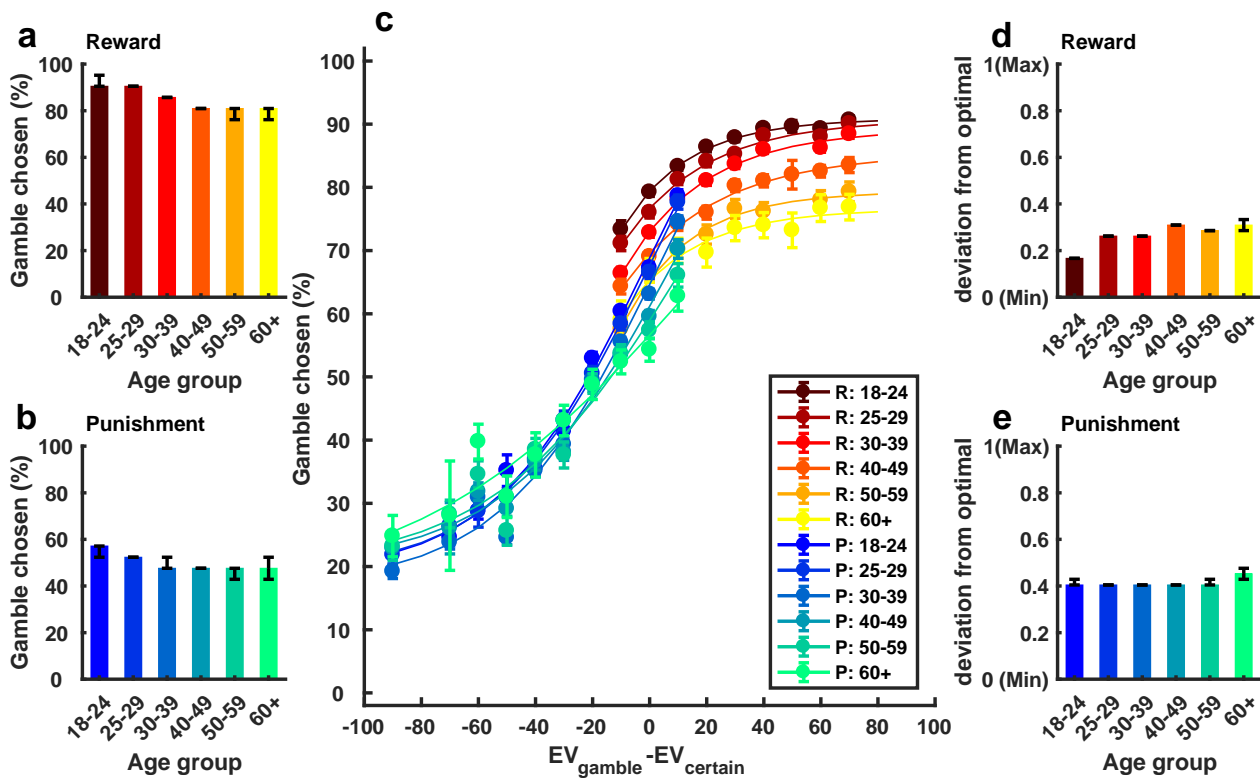

150

151 **Figure 3: The proportion (%) of trials in which participants chose to gamble.** (a) Gamble rate in the reward and (b)  
 152 punishment domain; (c) Propensity to choose the gamble option as a function of  $EV_{\text{gamble}} - EV_{\text{certain}}$  (data was grouped  
 153 into bin sizes of 10). As indicated in the legend, each of the warm colours represents one age group in the reward (R)  
 154 condition, and each of the cool colours represents one age group in the punishment (P) condition. The lines are fitted  
 155 lines to  $y=a*\exp(-b*x)+c$ ;  $R^2=0.979 \pm 0.022$ ; (d) Discrepancy between choice behaviour and optimal decisions in the  
 156 reward domain. Specifically, using  $EV_{\text{gamble}} - EV_{\text{certain}}$  we calculated whether the optimal decision on each trial was to  
 157 gamble (1) or skip (0). We then subtracted this value from the observed behaviour of the participant (gamble=1, skip  
 158 =0). If the average absolute difference between these values across trials was 0, then a participant was deemed as an  
 159 optimal decision-maker; (e) Discrepancy between choice behaviour and optimal decisions in the punishment domain.  
 160 Bars and error bars represent medians across the participants and bootstrap 95% CIs.  
 161

162 Given these results, do older adults make less optimal motor decisions? An ideal (optimal) decision-maker  
 163 chooses the option that has the higher expected value, and we therefore compared participant's choice  
 164 behaviour with the optimal behaviour. Specifically, using  $EV_{\text{gamble}} - EV_{\text{certain}}$  we calculated whether the  
 165 optimal decision on each trial was to gamble or decline (coded 1 and 0 respectively). We then subtracted this  
 166 value from the observed behaviour of the participant (also coded gamble = 1, decline = 0). If the average  
 167 absolute difference between these values across trials was 0, then a participant was deemed an optimal  
 168 decision-maker. In reward trials, there was progressive deviation from optimality across the lifespan (Figure  
 169 3d;  $r=0.232$ ;  $p<0.001$ ). In contrast, for punishment trials, all age groups showed a similar level of sub-  
 170 optimality (Figure 3e;  $r=0$ ;  $p=0.999$ ). Therefore, the most pronounced effect of ageing on motor decision-  
 171 making was a value-independent decrease in gamble rate during reward trials which led to a significant  
 172 decrease in optimality.  
 173

173

174 While these data portray many similarities with decision-making under risk<sup>14, 15</sup>, there are also clear  
 175 differences. For example, decision-making models based on prospect theory are not able to explain the  
 176 gradual, monotonic and value independent decrease in gamble rate across the life span observed during the



177 reward trials<sup>5</sup> (Figure S1). We predicted that such dichotomies represented the contribution of value-  
178 independent Pavlovian approach-avoidance biases to motor decision-making behaviour. To test this  
179 prediction, we modelled the choice behaviour using an established decision-making model based on prospect  
180 theory, and a newly introduced model which included Pavlovian approach-avoidance parameters<sup>2, 5</sup> (see  
181 Methods). The prospect theory model included three components: (1) loss aversion parameter ( $\lambda$ ) (2) risk  
182 preference parameter ( $\alpha$ ) and (3) stochasticity of decision-making captured by an inverse temperature  
183 parameter ( $\mu$ ). The loss aversion coefficient ( $\lambda$ ) represents the relative (multiplicative) weighting of losses  
184 relative to gains, which was set to 1 as there were no gambles with both positive and negative outcomes in  
185 our task. The risk preference parameter ( $\alpha$ ) represents the diminishing sensitivity to change in value with an  
186 increase in absolute value (value-dependent). The logit parameter  $\mu$  is the sensitivity of the choice  
187 probability to an option value difference. In addition to these parameters, the Pavlovian approach-avoidance  
188 model included value-independent parameters exclusively for reward ( $\delta^+$ ) and punishment ( $\delta^-$ ) trials.  
189 Positive or negative values of these parameters correspond, respectively, to an increased or decreased  
190 probability of gambling without regard to the value of gamble (see Methods; Eq 3). We found an approach-  
191 avoidance decision model with 4 parameters (a single risk preference parameter:  $\alpha$ , the inverse temperature  
192 parameter:  $\mu$ , value-independent parameters exclusively for reward  $\delta^+$  and punishment  $\delta^-$  trials) fitted the  
193 motor gamble (choice) data better than any decision model based on prospect theory (Table S1, Figure S2 &  
194 S3; see Methods for model comparison).

195  
196 Using this preferred model, we observed age-related changes across the reward and punishment domains for  
197 both value-dependent and independent parameters. However, the most striking effect was a large decrease in  
198 Pavlovian attraction which facilitates action in pursuit of reward. Specifically, we found that healthy ageing  
199 did not affect the stochasticity parameter,  $\mu$  ( $r=-0.001$ ,  $p=0.871$ ), but was associated with a decrease in the  
200 risk preference parameter,  $\alpha$  (Figure 4a,d;  $r=-0.105$ ,  $p<0.001$ ). The winning model included a single  $\alpha$   
201 parameter, which represented different value-dependent biases in reward and punishment ( $\alpha<1$  indicated risk  
202 aversion in reward domain and  $\alpha<1$  represented risk-seeking in punishment domain;  $\alpha=1$  represented risk-  
203 neutral; see Supplementary Methods). Therefore, older adults displayed a similar increase in value-  
204 dependent biases across the reward and punishment domain. The greater risk-seeking effect in the  
205 punishment domain was offset by the fact that ageing was also linked with greater Pavlovian avoidance  
206 (Figure 4b, d;  $\delta^-$ ;  $r=-0.076$ ,  $p<0.001$ ), an effect not previously observed in economic decision-making<sup>2</sup>. Such  
207 opponent effects between value-dependent and value-independent parameters help to explain the complex  
208 changes observed with ageing during punishment trials (Figure 3c). Nevertheless, the largest effect of ageing  
209 was a substantial decrease in Pavlovian attraction (Figure 4b, d;  $\delta^+$ ;  $r=-0.146$ ,  $p<0.001$ ). We found a similar  
210 decline for both sexes (Figure S4; male:  $n=15911$ ,  $r=-0.140$ ,  $p<0.001$ ; female:  $n=10621$ ,  $r=-0.143$ ,  $p<0.001$ ),  
211 and across all education levels (Figure S5; school:  $n=9171$ ,  $r=-0.152$ ,  $p<0.001$ ; university:  $n=11281$ ,  $r=-$   
212  $0.142$ ,  $p<0.001$ ; advanced:  $n=6080$ ,  $r=-0.136$ ,  $p<0.001$ ). Importantly, we did not observe this age-related  
213 effect for the temperature parameter ( $\mu$ ), indicating the changes observed in the risk and Pavlovian  
214 parameters were not simply a result of large participant numbers (Figure 4d).

215

216 Finally, through this app-based platform a subset of participants (n=17,220) also performed an economic  
 217 decision-making gambling task in which a similar approach-avoidance model was used to explain choice  
 218 behaviour<sup>2</sup>. Through correlation and median-split analysis we found a significant positive relationship for all  
 219 main model parameters between the tasks (Figure 4e, f), consistent with participants manifesting similar  
 220 decision-making tendencies across motor and economic domains. This relationship was relatively consistent  
 221 across the lifespan whereby a positive correlation existed between these parameters within each age group  
 222 (Figure S6, S7). Once again, we did not observe this correlation for the temperature parameter ( $\mu$ ).

223

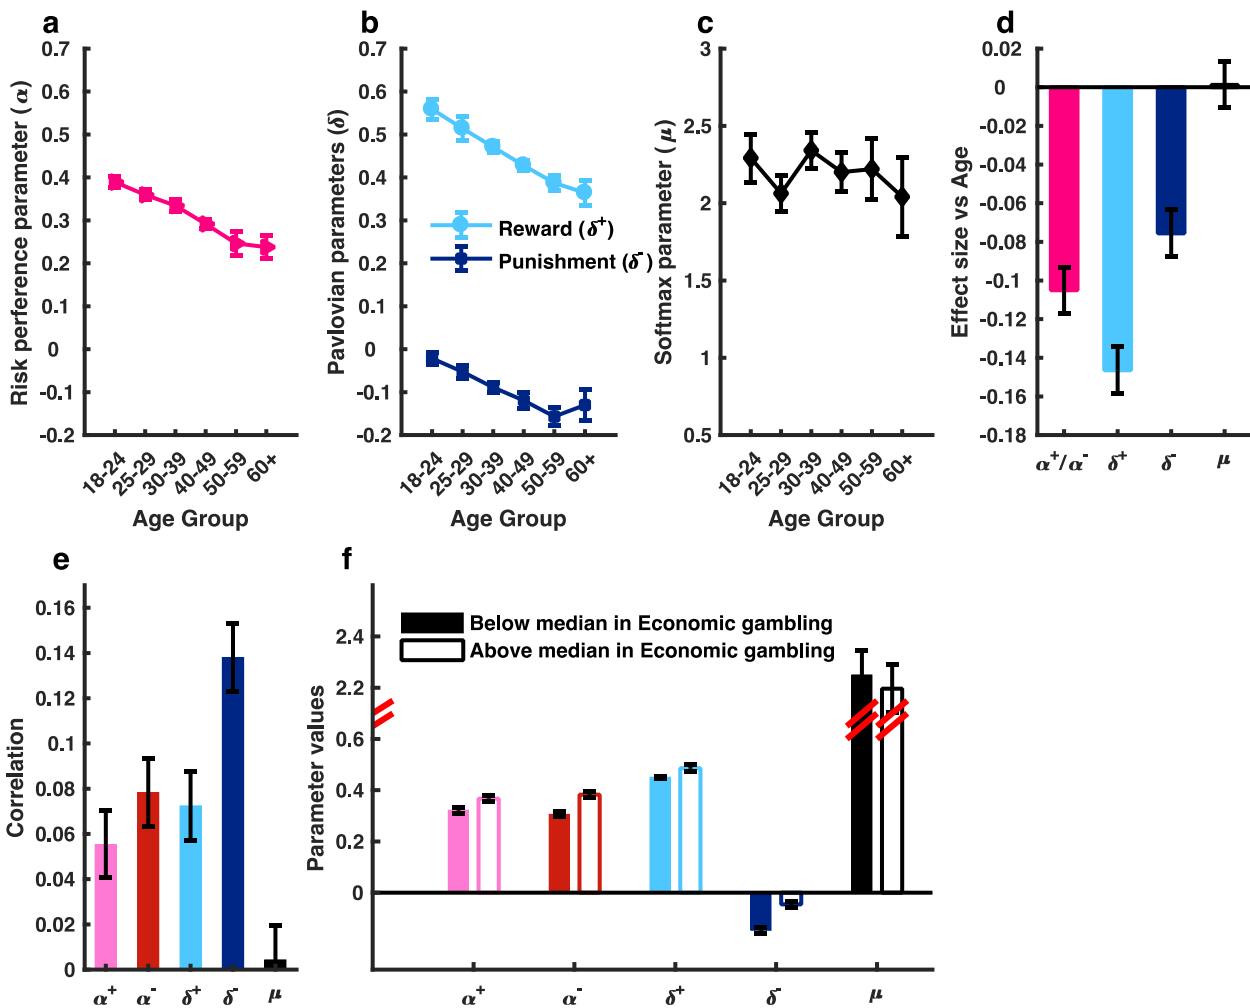

224

225 **Figure 4: The change in approach-avoidance model parameters across the life span, and the relationship**  
 226 **between approach-avoidance model parameters across a motor and economic gambling task. (a)**  $\alpha$  across age  
 227 groups; **(b)**  $\delta^-$  and  $\delta^+$  across age groups; **(c)**  $\mu$  across age groups; **(d)** Age-related decline across the reward and  
 228 punishment domain. The largest effect size was observed for the Pavlovian approach parameter ( $\delta^+$ ). This age-related  
 229 effect was not observed for the temperature parameter,  $\mu$ ; **(e)** Positive correlation across independent motor and  
 230 economic decision tasks for the main approach-avoidance model parameters. Note, the single  $\alpha$  parameter of the motor  
 231 decision-making model was correlated with both the  $\alpha^-$  and  $\alpha^+$  parameters of the decision-making model. This positive  
 232 correlation was not observed for the temperature parameter,  $\mu$ ; **(f)** Motor decision-making approach-avoidance  
 233 parameter values median split by economic parameter values. Filled bars denote participants with below-median values  
 234 in the economic gambling task; Hollow bars for above-median. The participants with above-median risk parameters and  
 235 Pavlovian parameters in the economic decision task had higher risk parameters and Pavlovian parameters in the motor  
 236 gambling task. This median split effect was not observed for the temperature parameter,  $\mu$ ; Bars/error bars reflect  
 237 medians/bootstrapped 95% CIs.

238



239 Making decisions under uncertainty is crucial in everyday life, whether it is managing retirement funds,  
240 choosing a career, or deciding between pulling out or not on to a busy road whilst driving. The latter example  
241 describes motor decision-making, a unique kind of decision which requires weighting potential rewards and  
242 punishments against the probability of successfully executing an action<sup>7, 19-21</sup>, and often with immediate  
243 outcomes. Although healthy ageing has been associated with decreased risk taking across both motor<sup>1</sup> and  
244 economic<sup>2-4</sup> decision-making, it is heretofore unknown whether a single underlying mechanism might  
245 explain these changes. We addressed this question using a novel motor gambling task that exploited an app-  
246 based platform which enabled us to collect a large cohort of data. Unlike previous work on motor decision-  
247 making<sup>7, 19-21</sup>, we considered choice behaviour in relation to both value-dependent instrumental and value-  
248 independent Pavlovian processes<sup>5, 11, 18</sup>. We found age-related changes across the punishment and reward  
249 domain for both value-dependent and independent parameters. However, the most striking effect of ageing  
250 was a decrease in Pavlovian attraction which facilitates action in pursuit of reward. Through this app-based  
251 platform, we compared a subset of participant's choice behaviour during motor and economic decision-  
252 making<sup>2</sup> and found similar decision-making tendencies across motor and economic domains.

253

254 Our large cohort and use of a newly established approach-avoidance computational model<sup>2, 6</sup> enabled us to  
255 detect subtle age-related changes in choice behaviour and surprising interactions between value-independent  
256 and value-dependent processes. For instance, the risk aversion parameter ( $\alpha$ : instrumental value-dependent  
257 process) was on average less than 1 across all age groups, indicating risk aversion in reward, and risk seeking  
258 in punishment. This choice behaviour was best explained using a single parameter, signifying a similar  
259 degree of risk aversion in reward and risk-seeking in punishment. Importantly, this value progressively  
260 decreased with age suggesting that older adults showed similar increased risk-aversion for reward and risk-  
261 seeking for punishment. This is in line with previous economic decision-making work which revealed older  
262 adults weigh certainty (achieving the small reward or avoiding the small punishment) more heavily than  
263 younger adults<sup>32</sup>. Interestingly, the greater risk-seeking in the punishment domain was offset by the fact that  
264 ageing also led to greater Pavlovian avoidance, an effect not observed in economic decision-making<sup>2</sup>. It is  
265 the interaction between value-dependent and independent parameters that help explain not only the complex  
266 changes observed with ageing during punishment trials but also the lack of difference across age groups for  
267 punishment-based optimality. Crucially, previous work in motor decision-making using only instrumental-  
268 based processes would not have detected such complex behavioural interactions<sup>1, 7, 21</sup>. The underlying  
269 mechanism behind age-dependent increases in Pavlovian avoidance is unknown. It has been suggested that  
270 the neurobiology behind Pavlovian avoidance may involve opponency between the dopaminergic and  
271 serotonergic systems<sup>33</sup>. Despite there being evidence of age-related decline in serotonin receptor  
272 availability<sup>34</sup>, it remains an open question as to the link between serotonin and Pavlovian avoidance during  
273 either motor or economic decision-making.

274

275 The strongest effect of ageing was a decrease in Pavlovian attraction to reward. As all age groups displayed  
276 risk aversion during reward trials, this decrease in Pavlovian attraction led to greater sub-optimality in older

277 adults. These results are strikingly similar to the ones observed in economic decision-making<sup>2</sup>, suggesting  
278 Pavlovian attraction plays a pivotal role in explaining age-related changes to reward across both motor and  
279 economic decision-making. During economic decision-making, it has recently been shown that boosting  
280 dopamine with L-DOPA increases the influence of Pavlovian attraction on choice behaviour<sup>5</sup>. In addition,  
281 healthy ageing is associated with a gradual decline in dopamine availability<sup>35, 36</sup> and neural responses to  
282 reward<sup>37</sup>. Therefore, it is possible that the decrease in Pavlovian attraction during motor decision-making in  
283 older adults is a result of an age-dependent decrease in dopamine availability.

284

285 More broadly, the current work shows the importance of both instrumental value-dependent and Pavlovian  
286 value-independent processes on motor decision-making. However, task design may play an important role in  
287 determining the size of Pavlovian influences. Here we used a ‘go/no-go’ decision-making task as previous  
288 literature has shown the ‘go/no-go’ component induces strong Pavlovian biases<sup>11, 25, 38</sup>. It remains to be seen  
289 whether computational models including Pavlovian biases provide a better description of choice behaviour  
290 during other motor decision-making tasks which do not involve a ‘go/no-go’ component<sup>1, 7-10, 22</sup>.

291

292 Finally, participants showed similar decision-making tendencies for both instrumental (value-dependent) and  
293 Pavlovian (value-independent) parameters across motor and economic domains. This extends previous work  
294 that revealed a similar relationship with parameters derived from parametric decision models based on  
295 prospect theory<sup>7, 10</sup>, and reinforces the view that the mechanisms which control cognitive (economic) and  
296 motor decision-making are integrated<sup>39</sup>. However, the correlation between the tasks was small, around  $r=0.1$ ,  
297 suggesting that while participants showed similar behavioural trends across the two tasks, their performance  
298 in motor and economic domains was also distinct. Interestingly, the approach-avoidance model not only  
299 fitted choice data substantially better for the motor decision-making task, relative to the economic task, but  
300 the effect size relating to age was also nearly double in size for all parameters<sup>2</sup>. This indicates that while  
301 there are clear similarities between cognitive and motor decision-making, computational models including  
302 Pavlovian biases appear to be particularly important for explaining motor decision-making.

303

304 In conclusion, Pavlovian biases play an important role in not only explaining motor decision-making  
305 behaviour but also the changes which occur through normal ageing. This provides a greater understanding of  
306 the processes which shape motor decision-making across the lifespan, and may afford essential information  
307 for developing population wide translational interventions such as promoting activity in older adults.

308

## 309 **Methods**

### 310 *Participants*

311 We tested 26,532 participants (15,911 males, aged 18-70+) who completed the task between November 20,  
312 2013 and August 15, 2015. Data were only included if users fully completed the game and it was their first  
313 attempt. We also recruited an additional 60 participants (29 males, aged 18-70+) who were asked to estimate

314 their success rate (motor performance). All participants gave informed consent and the Research Ethics  
315 Committee of University College London approved the study.

316

### 317 ***Materials and apparatus***

318 Using an app-based platform (The Great Brain Experiment: [www.thegreatbrainexperiment.com](http://www.thegreatbrainexperiment.com)) we  
319 developed a motor decision-making task ('How do I deal with pressure?') which is freely available for Apple  
320 iOS and Google Android systems. The game runs in a 640x960 (3:4 ratio) pixel area, which is then scaled to  
321 fit the screen whilst maintaining this ratio. The game required participants to 'throw' a ball at a coconut in an  
322 attempt to knock it off its perch. This was achieved by tapping 5 sequential targets along a pre-defined path.  
323 The path was characterised by an angle parameter that represented a section of a sine curve, in degrees. The  
324 curves were drawn from the bottom (the starting point) to top of the game window (Figure 1a, b). For  
325 example, if the angle parameter was 360, then one complete cycle of the sine curve was used to draw the  
326 curve. During the task, the angle was randomly chosen between 0 and 360. The 5 targets were evenly spaced  
327 along the curves. If the participant tapped all 5 targets sequentially (from bottom to top) within 1.2 seconds,  
328 then the action was considered a success and the coconut was hit. If the participant failed to tap all 5 targets  
329 accurately or within the allotted time then the action was considered a failure and the ball sailed past the  
330 coconut. In addition, the action was deemed a failure if participants did not start the tapping action within 7  
331 seconds after they chosen to do the tapping. There were 7 different target sizes across trials with the tapping  
332 action becoming more difficult as the target size was reduced. However, as mentioned above, the game  
333 interface was scaled to screen size. Therefore, motor performance (success rate) was examined relative to the  
334 interaction between target size and screen size (Figure 1g). All trial-by-trial data (including tasks parameters,  
335 behavioural results, modelling results and accompanying code) are available on our open-access data  
336 depository (<https://osf.io/fu9be/>).

337

### 338 ***Motor gambling task***

339 At the beginning of each trial, participants were shown the action required (i.e. the position and size of the 5  
340 targets) and were asked to make a motor gamble. There were two types of trials: reward trials and  
341 punishment trials (Figure 1a, b). For reward trials, participants had to decide whether to skip the trial and  
342 stick with a small reward (10 points) or gamble on successfully executing the 'throw'. If successful they  
343 received a greater reward (20, 60 or 100 points) but 0 points if they failed. For punishment trials, participants  
344 had to decide whether to skip the trial and stick with a small punishment (-10 points) or gamble on  
345 successfully executing the 'throw'. If successful they lost nothing (0 points) but failure resulted in a greater  
346 punishment (-20, -60 or -100 points). Hence, there were 6 value combinations. Each combination was  
347 repeated for each of the 7 different target sizes (6 values x 7 target sizes = 42 trials). Although there were 7  
348 blocks of the game this did not directly relate to the 7 target sizes. In order to maintain a level of  
349 unpredictability, the first 3 blocks included random presentation of the 3 largest (easiest) target sizes, the  
350 next 3 blocks included target sizes 4-6 and the final block included the smallest (most difficult) target size.  
351 Participants began with 250 points and the overall goal was to accumulate as many points as possible.

352

353 For the control study (Figure 2) which examined participant's ability to estimate their probability of success,  
354 individuals were asked to estimate their probability of motor success (0% to 100% in steps of 10%) after  
355 being shown the target size and trajectory. After this estimate, they were then asked to perform the tapping  
356 action, whilst ignoring the decision-making part of the game.

357

### 358 *Data analysis*

359 Matlab (Mathworks, USA) was used for all data analysis. We reported partial correlation coefficients ( $r$ ) for  
360 the relationships between task measures and age, whilst controlling for the effects of gender and education.  
361 All  $p$  values were computed based on permutation tests using 100,000 random shuffles of age labels to  
362 determine null distributions<sup>2</sup>. Bootstrapped 95% confidence intervals were computed based on 100,000  
363 resamples with replacement in each age group<sup>2</sup>.

364

### 365 *Parametric models*

366 On each trial participants faced a gamble that contained a certain option (CO) involving a payoff of certain  
367 points (+10 in reward trials and -10 in punishment trials), and a gambling option (GO) in which the outcome  
368 depended on a probability of successfully executing the tapping action. The probability was estimated given  
369 a participant's age, screen size of the device used and target-size level (Figure 1g). Specifically, the  
370 probability of success for a participant within a certain age group, using a certain screen size and facing a  
371 certain target size on each trial was estimated using the average success rate across all the participants with  
372 the same age, same screen size, and facing the same target size. Given the small amount of trials we had for  
373 each participant at each target size to estimate their probability of success, we believed this group average  
374 approach was the most valid estimate of success probability. However, we also conducted the analysis when  
375 success probability was estimated based on each individual's own data (i.e. the probability of success for a  
376 participant facing a certain target size was estimated using their own success rate over the same target size).  
377 Importantly, our findings still hold (Figure S8). We modelled participant motor gamble choices using an  
378 established decision-making model based on prospect theory<sup>15</sup> and a newly introduced model which included  
379 an extra Pavlovian approach-avoidance<sup>2, 5, 6</sup> component. In the following, we first describe the prospect  
380 theory models, followed by the approach-avoidance models.

381

382 *Parametric decision-making model based on prospect theory:* There are three key components in  
383 prospect theory models. The first component is the value function. According to prospect theory, the  
384 subjective desirability of outcomes is modelled as transformations of objective task quantities. The  
385 subjective desirability of the outcomes,  $O$  (the points in this case) was modelled by a value function (2-part  
386 power function) of the form:

387

$$388 \quad u(O) = \begin{cases} O^{\alpha^+} & \text{if } O \geq 0 \\ -\lambda \cdot (-O)^{\alpha^-} & \text{if } O < 0 \end{cases} \quad \text{Equation 1}$$

389 where, the risk preference parameter ( $\alpha$ ) represents the diminishing sensitivity to changes in values as the  
 390 absolute value increases (if  $\alpha < 1$ ). The loss aversion coefficient ( $\lambda$ ) represents the weighting of losses  
 391 relative to gains, which was set to 1 as we did not have gambles with both positive and negative outcomes.  
 392 The second component of a prospect theory model is the probability weighting function. Most prospect  
 393 theory models assume that probabilities are weighted non-linearly. However, we found that the probability  
 394 weighting parameter ( $\gamma$ ) did not significantly improve the model fit (Table S1, we used a 1-parameter  
 395 probability weighting function<sup>40</sup>:  $w(p) = \exp(-(-\ln(p))^\gamma)$ ). Hence, probabilities and utilities were  
 396 combined linearly in the form:  $U(p, O) = p * v(O)$ . The third component of a prospect theory model is the  
 397 choice function. The probability of choosing to gamble is given by the logit or soft-max function:

$$398$$

$$399 \quad F(p, O_1, O_2, O_c) = (1 + \exp[-\mu(U(p, O_1, O_2) - U(O_c))])^{-1} \quad \text{Equation 2}$$

$$400$$

401 where  $O_1$  and  $O_2$  are the outcomes in the gamble option [ $p \rightarrow O_1; (1-p) \rightarrow O_2$ ], and  $O_c$  is the outcome of the  
 402 certain option. The logit parameter  $\mu$  is the sensitivity of the choice probability to the utility difference. In  
 403 summary, our prospect theory models included the following free parameters: risk preference parameter ( $\alpha$ )  
 404 and stochasticity of decision-making according to the inverse temperature parameter ( $\mu$ ).

405

406 *Parametric approach-avoidance decision model:* Approach-avoidance models were based on the  
 407 prospect theory models, but with an additional component that allows for value-independent influences to  
 408 choose or not choose gambles. Specifically, Pavlovian parameter ( $\delta$ ) were added to the probability of  
 409 choosing to gamble (Equation 2) as follows:

$$410$$

$$411 \quad F(p, O_1, O_2, O_c) = (1 + \exp[-\mu(U(p, O_1, O_2) - U(O_c))])^{-1} + \delta$$

$$412 \quad F(p, O_1, O_2, O_c) = \max(0, \min(F(p, O_1, O_2, O_c), 1)) \quad \text{Equation 3}$$

$$413$$

414 Positive or negative values of the parameter ( $\delta$ ) correspond respectively to an increased or decreased  
 415 probability of gambling without regard to the value of gamble. Other parts of the models were identical to  
 416 the prospect theory models. In summary, the approach-avoidance model included the following free  
 417 parameters: risk preference parameter ( $\alpha$ ), stochasticity of decision-making according to the inverse  
 418 temperature parameter ( $\mu$ ) and Pavlovian parameter ( $\delta$ ).

419

420 ***Parameter optimisation and model selection procedures***

421 The models were fit to individual choice data. The method of maximum likelihood was used to estimate  
 422 (fminsearch in Matlab) the parameter vector  $\Theta$  given the participant choice ( $y$ ) on each trial ( $p, O_1, O_2, O_c$ ):

$$423$$

$$424 \quad L(\Theta|y, p, O_1, O_2, O_c) \quad \text{Equation 4}$$

$$425 \quad = \sum_{i=1}^N y_i \log(F(p(i), O_1(i), O_2(i), O_c(i), \Theta)) + (1 - y_i) \log(1 - F(p(i), O_1(i), O_2(i), O_c(i), \Theta)))$$

426

427 Where,  $i$  indexes the trial number;  $N$  is the number of trials;  $y_i$  indicates participant choice on trial  $i$ ;  
428  $\Theta$  indicates the parameter vector to be estimated;  $(p, O_1, O_2, O_c)$  represent the gamble options on each trial.  
429 Parameters were constrained to the following ranges:  $\alpha: 0 \rightarrow 1$ ;  $\mu: 0 \rightarrow 10$ ;  $\delta: -1 \rightarrow 1$ . The model was fit  
430 to each participant's data, and the fitting was repeated at 200 random seed locations to avoid local minima.

431

432 For each key parameter of prospect theory and approach-avoidance models, we explored the possibility of  
433 using separate and single parameters for reward and punishment domains as well as a weighted or linear  
434 probability function. Therefore, we fitted each participant's choice data with 24 models (Table S1). We used  
435 Akaike's information criterion (AIC)<sup>41</sup> and Bayesian information criterion (BIC)<sup>42</sup> to compare model fits.  
436 Both of these represent a trade-off between the goodness of fit and complexity of the model and thus can  
437 guide optimal model selection. *Pseudo*  $r^2$  was calculated with the null model in which  $\alpha, \mu$  and  $\delta$  were  
438 restricted to 0 (*pseudo*  $r^2 = 1 - \frac{\ln(\hat{L}(\text{model}))}{\ln(\hat{L}(\text{null model}))}$ , where  $\hat{L}$ =Estimated likelihood).

439

#### 440 **Competing interests**

441 The authors declare no competing interests.

442

#### 443 **Acknowledgements**

444 We thank N. Millstone and Peter Zeidman for developing the app, R. Davis, C. Freemantle and R. Maddock  
445 for supporting data collection, D. Jackson, C. Brierley and C. Sheppard for supporting app development and  
446 R.C Miall for helpful comments on the manuscript. This work was supported by European Research Council  
447 Starter Grants MotMotLearn (637488) to JMG, ActSelectContext (260424) to SB. A Wellcome Trust  
448 Engaging Science: Brain Awareness Week Award (101252/Z/13/Z) supported app development. R.J.D  
449 is supported by the Wellcome Trust (078865/Z/05/Z). RR is supported by an MRC Career Development Award  
450 (MR/N02401X/1).

451

#### 452 **References**

- 453 1. Valsecchi, M., Billino, J. & Gegenfurtner, K.R. Healthy Aging Is Associated With Decreased Risk-  
454 Taking in Motor Decision-Making. *Journal of Experimental Psychology: Human Perception and*  
455 *Performance* (2017).
- 456 2. Rutledge, R.B., *et al.* Risk Taking for Potential Reward Decreases across the Lifespan. *Curr Biol* **26**,  
457 1634-1639 (2016).
- 458 3. Tymula, A., Rosenberg Belmaker, L.A., Ruderman, L., Glimcher, P.W. & Levy, I. Like cognitive  
459 function, decision making across the life span shows profound age-related changes. *Proc Natl Acad Sci U S*  
460 *A* **110**, 17143-17148 (2013).
- 461 4. Grubb, M.A., Tymula, A., Giliaie-Dotan, S., Glimcher, P.W. & Levy, I. Neuroanatomy accounts for  
462 age-related changes in risk preferences. *Nat Commun* **7**, 13822 (2016).



- 463 5. Rutledge, R.B., Skandali, N., Dayan, P. & Dolan, R.J. Dopaminergic Modulation of Decision  
464 Making and Subjective Well-Being. *J Neurosci* **35**, 9811-9822 (2015).
- 465 6. Rutledge, R.B., Skandali, N., Dayan, P. & Dolan, R.J. A computational and neural model of  
466 momentary subjective well-being. *Proc Natl Acad Sci U S A* **111**, 12252-12257 (2014).
- 467 7. Wu, S.W., Delgado, M.R. & Maloney, L.T. Economic decision-making compared with an equivalent  
468 motor task. *Proc Natl Acad Sci U S A* **106**, 6088-6093 (2009).
- 469 8. Trommershauser, J., Maloney, L.T. & Landy, M.S. Statistical decision theory and the selection of  
470 rapid, goal-directed movements. *Journal of the Optical Society of America. A, Optics, image science, and*  
471 *vision* **20**, 1419-1433 (2003).
- 472 9. Trommershauser, J., Maloney, L.T. & Landy, M.S. Statistical decision theory and trade-offs in the  
473 control of motor response. *Spatial vision* **16**, 255-275 (2003).
- 474 10. Jarvstad, A., Hahn, U., Rushton, S.K. & Warren, P.A. Perceptuo-motor, cognitive, and description-  
475 based decision-making seem equally good. *Proc Natl Acad Sci U S A* **110**, 16271-16276 (2013).
- 476 11. Guitart-Masip, M., *et al.* Go and no-go learning in reward and punishment: interactions between  
477 affect and effect. *Neuroimage* **62**, 154-166 (2012).
- 478 12. Guitart-Masip, M., Duzel, E., Dolan, R. & Dayan, P. Action versus valence in decision making.  
479 *Trends Cogn Sci* **18**, 194-202 (2014).
- 480 13. Dayan, P., Niv, Y., Seymour, B. & Daw, N.D. The misbehavior of value and the discipline of the  
481 will. *Neural Netw* **19**, 1153-1160 (2006).
- 482 14. Tversky, A. & Kahneman, D. Judgment under Uncertainty: Heuristics and Biases. *Science* **185**,  
483 1124-1131 (1974).
- 484 15. Kahneman, D. & Tversky, A. Prospect theory: an analysis of decision under risk. *Econoemtrica* **47**,  
485 263-291 (1979).
- 486 16. Sokol-Hessner, P., *et al.* Thinking like a trader selectively reduces individuals' loss aversion. *Proc*  
487 *Natl Acad Sci U S A* **106**, 5035-5040 (2009).
- 488 17. Frydman, C., Camerer, C., Bossaerts, P. & Rangel, A. MAOA-L carriers are better at making  
489 optimal financial decisions under risk. *Proc Biol Sci* **278**, 2053-2059 (2011).
- 490 18. Hunt, L.T., Rutledge, R.B., Malalasekera, W.M., Kennerley, S.W. & Dolan, R.J. Approach-Induced  
491 Biases in Human Information Sampling. *PLoS Biol* **14**, e2000638 (2016).
- 492 19. Trommershauser, J., Landy, M.S. & Maloney, L.T. Humans rapidly estimate expected gain in  
493 movement planning. *Psychological science* **17**, 981-988 (2006).
- 494 20. Trommershauser, J., Gepshtein, S., Maloney, L.T., Landy, M.S. & Banks, M.S. Optimal  
495 compensation for changes in task-relevant movement variability. *J Neurosci* **25**, 7169-7178 (2005).
- 496 21. Wu, S.W., Delgado, M.R. & Maloney, L.T. The neural correlates of subjective utility of monetary  
497 outcome and probability weight in economic and in motor decision under risk. *J Neurosci* **31**, 8822-8831  
498 (2011).
- 499 22. Jarvstad, A., Hahn, U., Warren, P.A. & Rushton, S.K. Are perceptuo-motor decisions really more  
500 optimal than cognitive decisions? *Cognition* **130**, 397-416 (2014).

- 501 23. Freeman, S.M. & Aron, A.R. Withholding a Reward-driven Action: Studies of the Rise and Fall of  
502 Motor Activation and the Effect of Cognitive Depletion. *J Cogn Neurosci* **28**, 237-251 (2016).
- 503 24. Freeman, S.M., Alvernaz, D., Tonnesen, A., Linderman, D. & Aron, A.R. Suppressing a  
504 motivationally-triggered action tendency engages a response control mechanism that prevents future  
505 provocation. *Neuropsychologia* **68**, 218-231 (2015).
- 506 25. Freeman, S.M., Razhas, I. & Aron, A.R. Top-down response suppression mitigates action tendencies  
507 triggered by a motivating stimulus. *Curr Biol* **24**, 212-216 (2014).
- 508 26. Takikawa, Y., Kawagoe, R., Itoh, H., Nakahara, H. & Hikosaka, O. Modulation of saccadic eye  
509 movements by predicted reward outcome. *Exp Brain Res* **142**, 284-291 (2002).
- 510 27. Weiler, J.A., Bellebaum, C. & Daum, I. Aging affects acquisition and reversal of reward-based  
511 associative learning. *Learning & memory* **15**, 190-197 (2008).
- 512 28. Mell, T., *et al.* Effect of aging on stimulus-reward association learning. *Neuropsychologia* **43**, 554-  
513 563 (2005).
- 514 29. McNab, F. & Dolan, R.J. Dissociating distractor-filtering at encoding and during maintenance. *J Exp*  
515 *Psychol Hum Percept Perform* **40**, 960-967 (2014).
- 516 30. Brown, H.R., *et al.* Crowdsourcing for cognitive science--the utility of smartphones. *PLoS One* **9**,  
517 e100662 (2014).
- 518 31. von Neumann, J. & Morgenstem, O. *Theory of Games and Economic Behavior* (Princeton University  
519 Press, Princeton, 1944).
- 520 32. Mather, M., *et al.* Risk preferences and aging: the "certainty effect" in older adults' decision making.  
521 *Psychology and aging* **27**, 801-816 (2012).
- 522 33. Boureau, Y.L. & Dayan, P. Opponency revisited: competition and cooperation between dopamine  
523 and serotonin. *Neuropsychopharmacology* **36**, 74-97 (2011).
- 524 34. van Dyck, C.H., *et al.* Age-related decline in central serotonin transporter availability with  
525 [(123)I]beta-CIT SPECT. *Neurobiology of aging* **21**, 497-501 (2000).
- 526 35. Backman, L., Nyberg, L., Lindenberger, U., Li, S.C. & Farde, L. The correlative triad among aging,  
527 dopamine, and cognition: current status and future prospects. *Neurosci Biobehav Rev* **30**, 791-807 (2006).
- 528 36. Karrer, T.M., Josef, A.K., Mata, R., Morris, E.D. & Samanez-Larkin, G.R. Reduced dopamine  
529 receptors and transporters but not synthesis capacity in normal aging adults: a meta-analysis. *Neurobiology*  
530 *of aging* **57**, 36-46 (2017).
- 531 37. Eppinger, B., Schuck, N.W., Nystrom, L.E. & Cohen, J.D. Reduced striatal responses to reward  
532 prediction errors in older compared with younger adults. *J Neurosci* **33**, 9905-9912 (2013).
- 533 38. Swart, J.C., *et al.* Catecholaminergic challenge uncovers distinct Pavlovian and instrumental  
534 mechanisms of motivated (in)action. *Elife* **6** (2017).
- 535 39. Chen, X., Mohr, K. & Galea, J.M. Predicting explorative motor learning using decision-making and  
536 motor noise. *PLoS Comput Biol* **13**, e1005503 (2017).
- 537 40. Gonzalez, R. & Wu, G. On the shape of the probability weighting function. *Cogn Psychol* **38**, 129-  
538 166 (1999).

- 539 41. Akaike, H. A new look at the statistical model identification. *IEEE transactions on automatic*  
540 *control* **19**, 716-723 (1974).
- 541 42. Schwarz, G. Estimating the dimension of a model. *The annals of statistics* **6**, 461-464 (1978).  
542

# Supplementary material: Age-dependent Pavlovian biases influence motor decision-making

*Xiuli Chen, Robb B. Rutledge, Harriet R. Brown, Raymond J. Dolan, Sven Bestmann, Joseph M. Galea*

## SUPPLEMENTARY METHODS

|                                                                                                 |            |
|-------------------------------------------------------------------------------------------------|------------|
| <b>PARTICIPANTS</b>                                                                             | <b>1</b>   |
| <b>PARAMETRIC DECISION-MAKING MODEL BASED ON PROSPECT THEORY</b>                                | <b>2</b>   |
| <b>PARAMETRIC APPROACH-AVOIDANCE DECISION MODEL</b>                                             | <b>2</b>   |
| <br>                                                                                            |            |
| <b>SUPPLEMENTARY RESULTS</b>                                                                    |            |
| <b>MODEL PARAMETER OPTIMIZATION AND MODEL SELECTION</b>                                         | <b>2-4</b> |
| <b>THE AGING EFFECT FOR EACH GENDER AND EDUCATION LEVEL</b>                                     | <b>5-6</b> |
| <b>CORRELATION ACROSS THE ECONOMIC AND MOTOR DECISION-MAKING TASKS WITHIN EACH AGE GROUP</b>    | <b>6-7</b> |
| <b>MODEL RESULTS WHEN PROBABILITY OF SUCCESS WAS BASED ON EACH INDIVIDUAL'S OWN PERFORMANCE</b> | <b>8</b>   |

## Supplementary Methods

### Participants

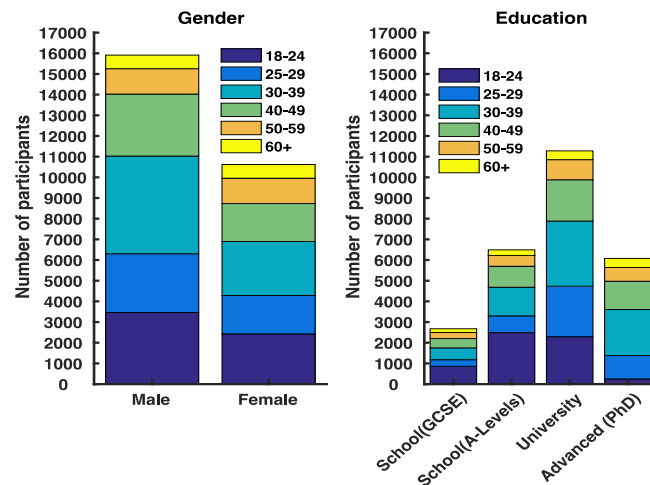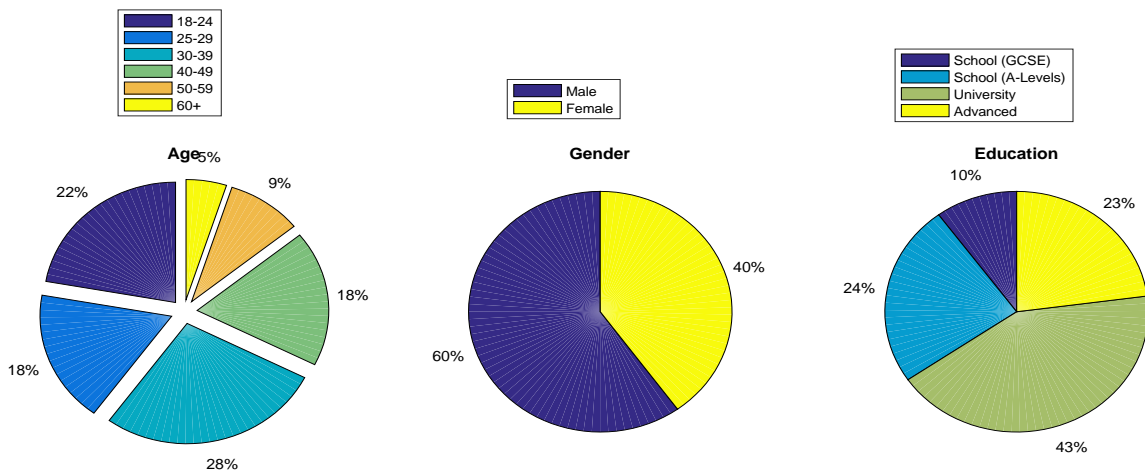

**Figure S1: Additional participant demographics**

29 ***Parametric decision-making model based on prospect theory***

30 As mentioned in the Methods, the subjective desirability of outcomes was modelled as transformations of  
31 objective task quantities. The subjective desirability of the outcomes  $O$  (the points in this case) was modelled  
32 by a value function (2-part power function) of the form as in Equation 1. The risk preference parameter ( $\alpha$ )  
33 represents the diminishing sensitivity to changes in values as the absolute value increases (if  $\alpha < 1$ ). The  
34 risk preference parameter ( $\alpha < 1$ ) is equivalent to risk aversion in the reward domain and risk seeking in the  
35 punishment domain, as demonstrated by the following examples. Imagine a gamble between a probabilistic  
36 reward: 50% of £20; 50% of £0 and a sure reward of £10. The objective expected value of the gamble is £10,  
37 similar to the certain option. Hence a risk neutral person would be indifferent between these two options. If  
38  $\alpha = 0.8$ , the gamble would have a subjective value of 5.49, and the certain option would have a subjective  
39 value of 6.31, which results in participants being more likely to choose the certain option (i.e., risk aversion).  
40 Now imagine a gamble between a probabilistic punishment 50% of -£20; 50% of £0 and a sure punishment  
41 of -£10. The objective expected value of gamble is -£10, similar to the certain punishment option. If  $\alpha = 0.8$ ,  
42 the gamble would have a subjective value of -5.49, and the certain option would have a subjective value of  
43 -6.31, which results in participants being more likely to choose the gamble option (i.e., risk seeking).  
44

45 ***Parametric approach-avoidance decision model***

46 Approach-avoidance Models were based on the prospect theory models, but with an additional  
47 component that allows for value-independent influences to choose or not choose gambles i.e., Pavlovian  
48 parameters ( $\delta$ ). Positive or negative values of the parameter ( $\delta$ ) correspond respectively to an increased or  
49 decreased probability of gambling without regard to the value of gamble. Other parts of the models were  
50 identical to the prospect theory models.  
51

52 **Supplementary Results**

53  
54 ***Model parameter optimization and model selection***

55 For each key parameter of prospect theory and approach-avoidance models, we explored the possibility of  
56 using separate and single parameters for gain and loss domains as well as a weighted or fixed probability  
57 function. Therefore, we fitted each participant's choice data with 24 models (Table S1). We used Akaike's  
58 information criterion (AIC) and Bayesian information criterion (BIC) to compare model fits (see main paper  
59 for relevant references). Both of these represent a trade-off between the goodness of fit and complexity of the  
60 model and thus can guide optimal model selection. *Pseudo*  $r^2$  was calculated with the null model in which  
61  $\alpha, \mu$  and  $\delta$  were restricted to 0 ( $pseudo\ r^2 = 1 - \frac{\ln(\hat{L}(model))}{\ln(\hat{L}(null\ model))}$ , where  $\hat{L}$ =Estimated likelihood). The  
62 preferred model's behavioural predictions among both the prospect theory models ( $[\alpha^+, \alpha^-, \mu^+, \mu^-]$ ; ID=4  
63 Table S1) and the approach-avoidance models ( $[\alpha, \mu, \delta^+, \delta^-]$ ; ID=10 Table S1) are plotted in  
64 Figure S2 and Figure S3, respectively.  
65

66

|                     |                              | ID        | Parameters                                                     | pseudo $r^2$<br>(mean±<br>sd) | pseudo $r^2$<br>(median) | BIC<br>(lower<br>value<br>preferred) | AIC<br>(lower<br>value<br>preferred) |
|---------------------|------------------------------|-----------|----------------------------------------------------------------|-------------------------------|--------------------------|--------------------------------------|--------------------------------------|
| <b>PT<br/>model</b> | Linear<br>prob               | 1         | $\alpha, \mu$                                                  | 0.20±0.18                     | 0.17                     | 1426604                              | 1334397                              |
|                     |                              | 2         | $\alpha, \mu^+, \mu^-$                                         | 0.30±0.15                     | 0.30                     | 1371245                              | 1232934                              |
|                     |                              | 3         | $\alpha^+, \alpha^-, \mu$                                      | 0.29±0.18                     | 0.27                     | 1392398                              | 1254087                              |
|                     |                              | 4         | $\alpha^+, \alpha^-, \mu^+, \mu^-$                             | 0.36±0.19                     | 0.35                     | 1382608                              | 1198193                              |
|                     | Weighted<br>prob<br>$\gamma$ | 5         | $\alpha, \mu, \gamma$                                          | 0.23±0.19                     | 0.19                     | 1494553                              | 1356242                              |
|                     |                              | 6         | $\alpha, \mu^+, \mu^-, \gamma$                                 | 0.31±0.15                     | 0.30                     | 1462708                              | 1278293                              |
|                     |                              | 7         | $\alpha^+, \alpha^-, \mu, \gamma$                              | 0.30±0.18                     | 0.28                     | 1484189                              | 1299773                              |
|                     |                              | 8         | $\alpha^+, \alpha^-, \mu^+, \mu^-, \gamma$                     | 0.35±0.19                     | 0.32                     | 1497729                              | 1267210                              |
| <b>AA<br/>model</b> | Linear<br>prob               | 9         | $\alpha, \mu, \delta$                                          | 0.44±0.24                     | 0.43                     | 1156367                              | 1018056                              |
|                     |                              | <b>10</b> | <b><math>\alpha, \mu, \delta^+, \delta^-</math></b>            | <b>0.52±0.25</b>              | <b>0.53</b>              | <b>1134654</b>                       | <b>950238</b>                        |
|                     |                              | 11        | $\alpha, \mu^+, \mu^-, \delta$                                 | 0.41±0.26                     | 0.39                     | 1315334                              | 1130919                              |
|                     |                              | 12        | $\alpha, \mu^+, \mu^-, \delta^+, \delta^-$                     | 0.53±0.25                     | 0.54                     | 1223419                              | 992900                               |
|                     |                              | 13        | $\alpha^+, \alpha^-, \mu, \delta$                              | 0.44±0.24                     | 0.42                     | 1255799                              | 1071384                              |
|                     |                              | 14        | $\alpha^+, \alpha^-, \mu, \delta^+, \delta^-$                  | 0.54±0.25                     | 0.55                     | 1211776                              | 981257                               |
|                     |                              | 15        | $\alpha^+, \alpha^-, \mu^+, \mu^-, \delta$                     | 0.46±0.24                     | 0.43                     | 1332344                              | 1101825                              |
|                     |                              | 16        | $\alpha^+, \alpha^-, \mu^+, \mu^-, \delta^+, \delta^-$         | 0.53±0.25                     | 0.54                     | 1321843                              | 1045220                              |
|                     | Weighted<br>prob<br>$\gamma$ | 17        | $\alpha, \mu, \delta, \gamma$                                  | 0.44±0.25                     | 0.42                     | 1260226                              | 1075810                              |
|                     |                              | 18        | $\alpha, \mu, \delta^+, \delta^-, \gamma$                      | 0.53±0.26                     | 0.55                     | 1215174                              | 984655                               |
|                     |                              | 19        | $\alpha, \mu^+, \mu^-, \delta, \gamma$                         | 0.42±0.27                     | 0.41                     | 1397167                              | 1166647                              |
|                     |                              | 20        | $\alpha, \mu^+, \mu^-, \delta^+, \delta^-, \gamma$             | 0.54±0.25                     | 0.55                     | 1306339                              | 1029716                              |
|                     |                              | 21        | $\alpha^+, \alpha^-, \mu, \delta, \gamma$                      | 0.43±0.25                     | 0.42                     | 1382322                              | 1151803                              |
|                     |                              | 22        | $\alpha^+, \alpha^-, \mu, \delta^+, \delta^-, \gamma$          | 0.54±0.25                     | 0.55                     | 1323605                              | 1046982                              |
|                     |                              | 23        | $\alpha^+, \alpha^-, \mu^+, \mu^-, \delta, \gamma$             | 0.47±0.24                     | 0.44                     | 1469428                              | 1192805                              |
|                     |                              | 24        | $\alpha^+, \alpha^-, \mu^+, \mu^-, \delta^+, \delta^-, \gamma$ | 0.53±0.25                     | 0.54                     | 1433450                              | 1110723                              |

67

68

69

70

71

72

73

74

**Table S1: Comparison of decision-making models.** The main parameters were (1) value function parameter ( $\alpha$ ); (2) the probability weighting parameter ( $\gamma$ ); the Softmax temperature parameter ( $\mu$ ); the Pavlovian parameter ( $\delta$ ). For each key parameter of the prospect theory (PT) and approach-avoidance (AA) models, we explored the possibility of using separate and single parameters for reward and punishment domains as well as a weighted or fixed probability function (see Methods). According to AIC and BIC model comparison an approach-avoidance decision model (red; ID=10) fitted the choice (gamble) data better than established decision models based on prospect theory.



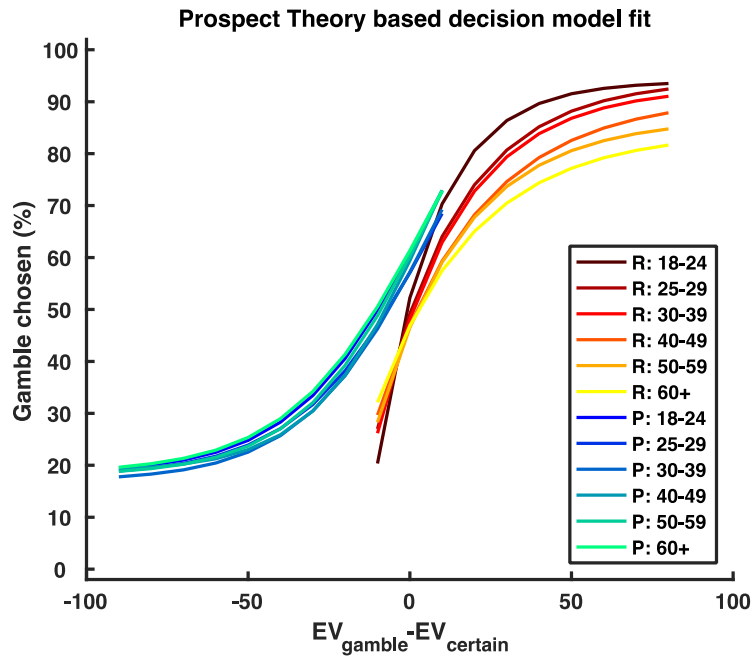

75  
76  
77  
78  
79  
80  
81  
82  
83  
84

**Figure S2: Average model fit across participants for the winning prospect theory model (ID=4 Table S1 [ $\alpha^+$ ,  $\alpha^-$ ,  $\mu^+$ ,  $\mu^-$ ]).** The model cannot account for the observed differences in choice behaviour during the motor decision-making task across the lifespan, including (1) the value-independent differences across age groups in the reward domain (Figure 3); (2) the changes in gamble propensity observed in the punishment domain across age groups (the model fit shows almost no difference across the age groups in the punishment domain); (3) the higher gamble rate in the reward domain relative to the punishment domain when the difference between expected values [ $EV_{\text{gamble}} - EV_{\text{certain}}$ ] is close to 0 (the model fit shows the opposite).

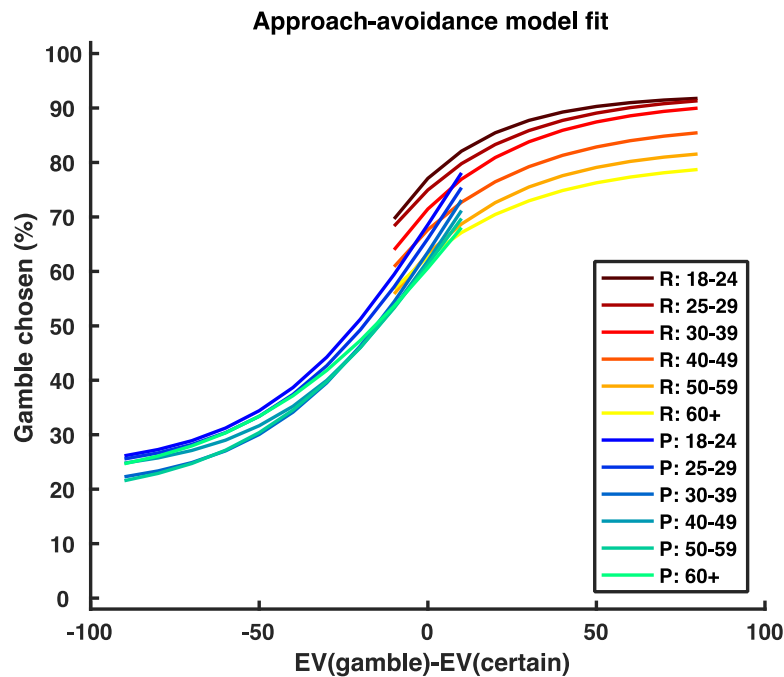

85  
86  
87  
88  
89  
90

**Figure S3: Average model fit across participants for the winning approach-avoidance model (ID=10 Table S1, [ $\alpha$ ,  $\mu$ ,  $\delta^+$ ,  $\delta^-$ ]).** The model does a far superior job of fitting choice behaviour during the motor decision-making task across the lifespan (Figure 2).

91 **The aging effect for each gender and education level**

92 We found similar aging effects in both males (n=15911, r=-0.140, p<0.001, Figure S) and females (n=10621,  
 93 r=-0.143, p<0.001, Figure S), and across all education levels (school: n=9171, r=-0.152, p<0.001; university:  
 94 n=11281, r=-0.142, p<0.001; advanced: n=6080, r=-0.136, p<0.001).  
 95

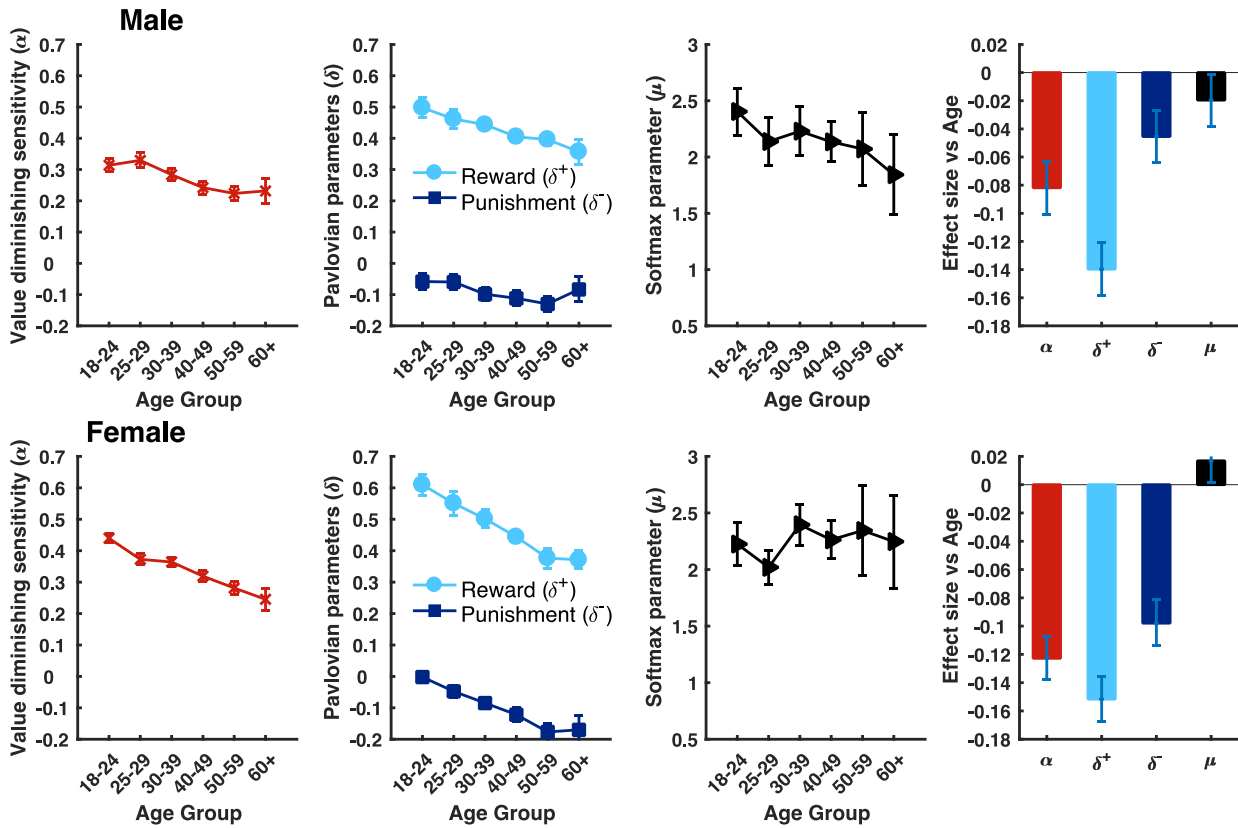

96  
 97

98 **Figure S4: The change in approach-avoidance model parameters across the life span for each gender**  
 99 **(top: male; bottom: female).** Column 1 from left:  $\alpha$  across age groups; Column 2:  $\delta^-$  and  $\delta^+$  across age  
 100 groups; Column 3:  $\mu$  across age groups; Column 4: age-related decline across the punishment and reward  
 101 domain. The largest effect size was observed for the Pavlovian approach parameter ( $\delta^+$ ); Bars and error bars  
 102 represent medians and bootstrapped 95% CIs.

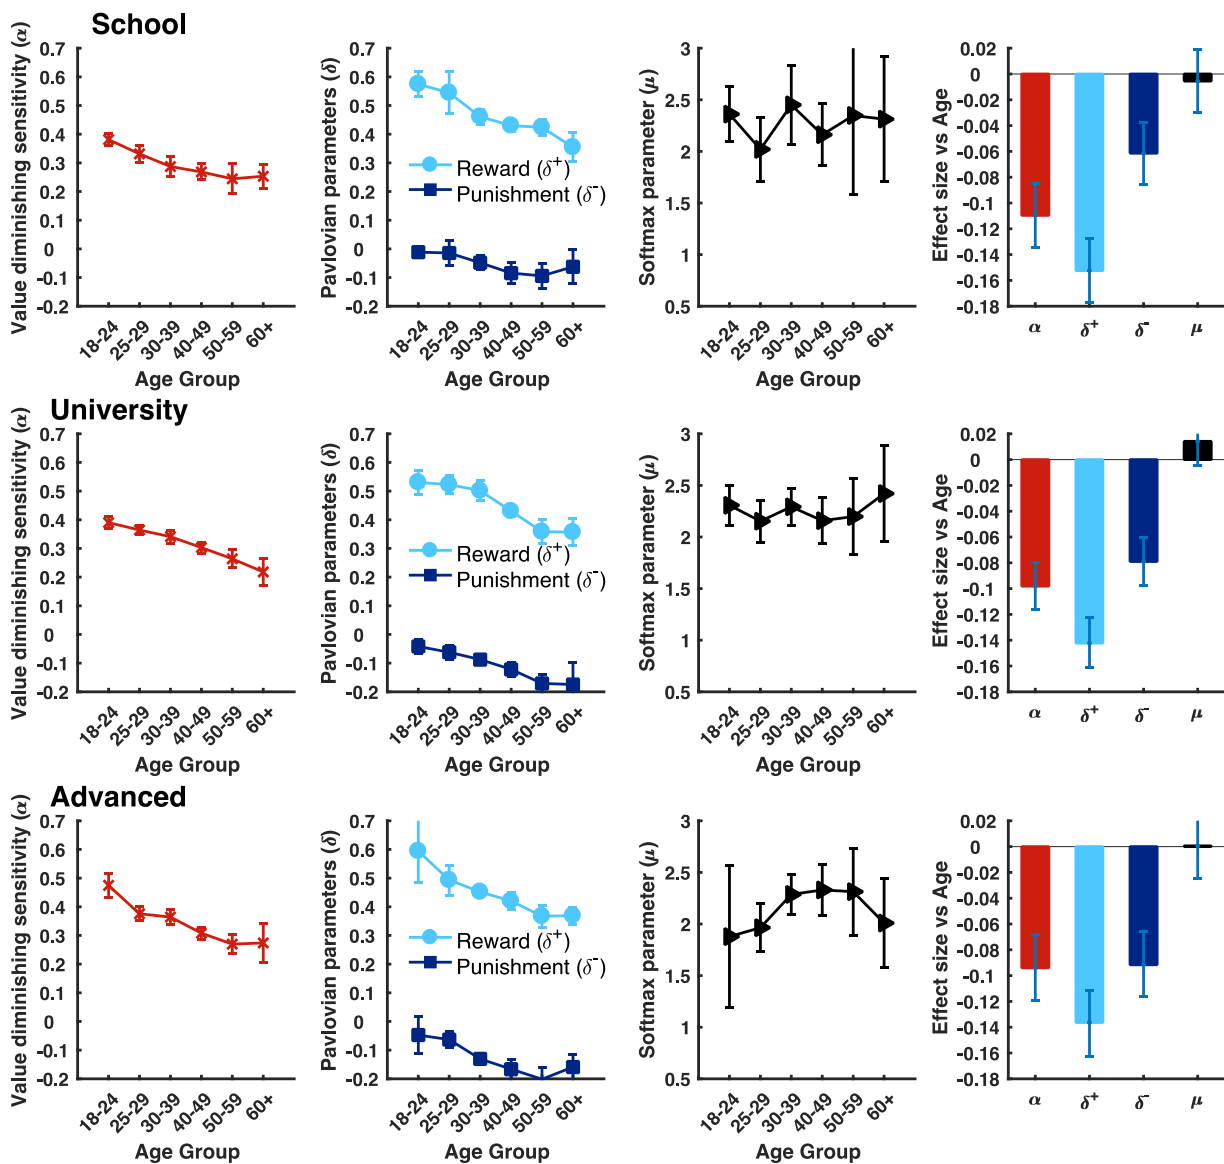

103  
104  
105  
106  
107  
108  
109  
110

**Figure S5: The change in approach-avoidance model parameters across the life span for each education level (top: school leavers; middle: university leavers; bottom: advanced (Masters, PhD)).** Column 1 from left:  $\alpha$  across age groups; Column 2:  $\delta^-$  and  $\delta^+$  across age groups; Column 3:  $\mu$  across age groups; Column 4: age-related decline across the punishment and reward domain. The largest effect size was observed for the Pavlovian approach parameter ( $\delta^+$ ); Bars and error bars represent medians and bootstrapped 95% CIs.

111  
112  
113  
114  
115  
116  
117  
118  
119  
120

***Correlation across the economic and motor decision-making tasks within each age group***

Through the app-based platform a subset of participants (n=17,220) also performed an economic decision-making gambling task in which a similar approach-avoidance model was used to explain choice behaviour (see main text for relevant reference). Through correlation and median-split analysis we found a small but significant positive relationship for all main model parameters between the tasks. This relationship was relatively consistent across the lifespan whereby we found a positive correlation between these parameters within each age group (Figure S6 & S7). However, although the oldest age group (60+) showed a similar trend, we did not have enough power (participant numbers) to reliably detect effect sizes of 0.05 within this group. Specifically, whilst the 60+ age group (n=783) had 0.28 power to detect 0.05 effect sizes, the next oldest group (50-59, n=1541) had near double the amount of power of 0.5.

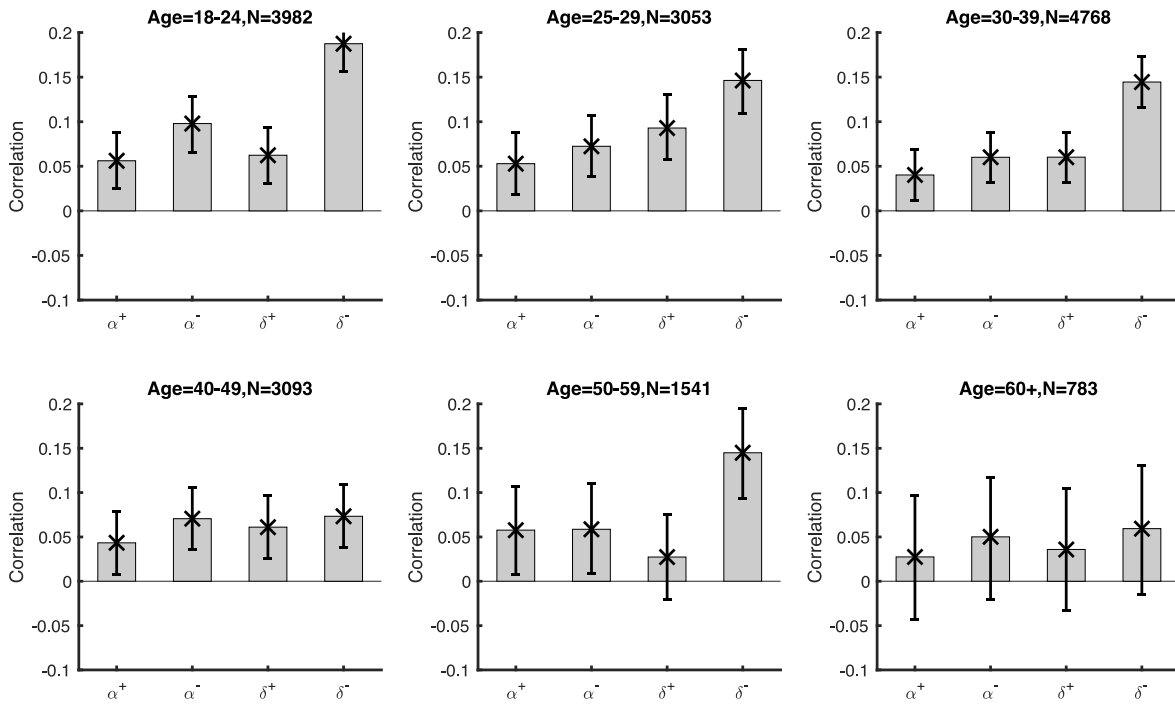

121  
122  
123  
124  
125  
126  
127  
128

**Figure S6: Correlation between motor and economic decision-making tasks for the main approach-avoidance model parameters within each age group.** This relationship was relatively consistent across the lifespan whereby we found a positive correlation between these parameters within each age group. Note, the single  $\alpha$  parameter of the motor decision-making model was correlated with both the  $\alpha^-$  and  $\alpha^+$  parameters of the decision-making model. Error bars reflect bootstrapped 95% CIs.

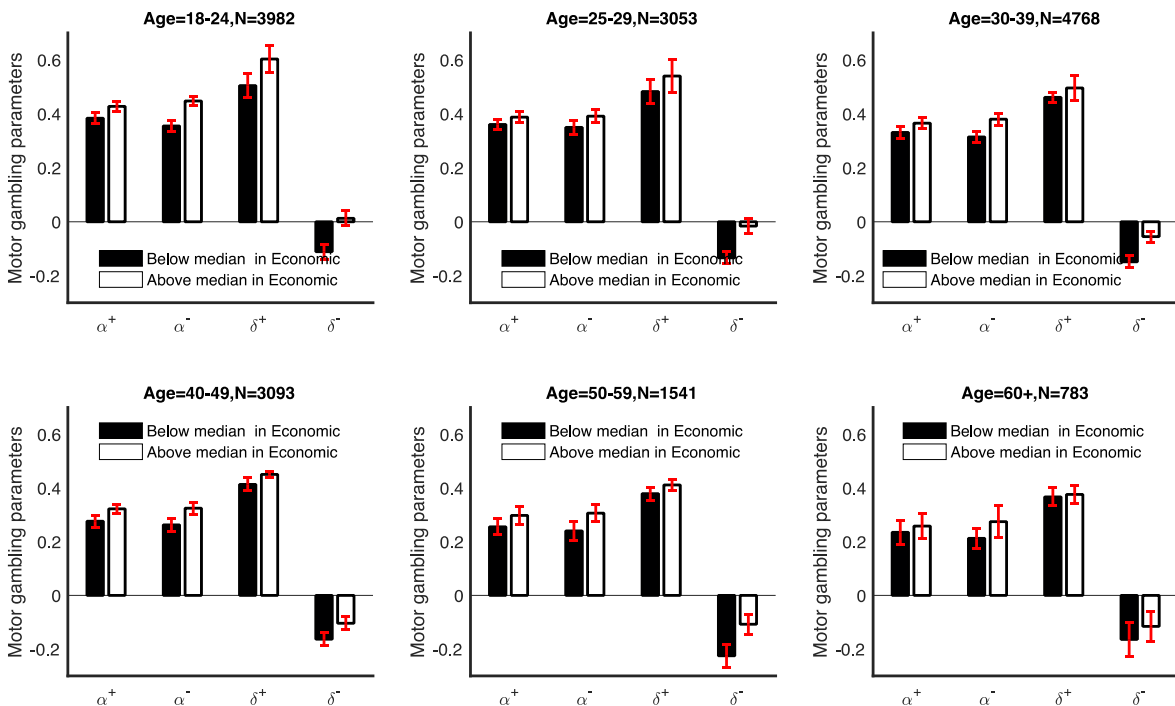

129  
130  
131  
132  
133  
134  
135  
136

**Figure S7: Motor decision-making approach-avoidance parameter values median split by economic parameter values within each age group.** Filled bars denote participants with below-median values in the economic gambling task; Hollow bars for above-median. The participants with above-median risk parameters and Pavlovian parameters in the economic decision task had generally higher risk parameters and Pavlovian parameters in the motor gambling task. Bars/error bars reflect medians/bootstrapped 95% CIs.

137 **Model results when probability of success was based on each individual's own performance**  
 138 In the main results, the probability of success for a participant within a certain age group, using a certain  
 139 screen size and facing a certain target size on each trial was estimated using the average success rate across  
 140 all the participants with the same age, same screen size, and facing the same target size. Given the small  
 141 amount of trials we had for each participant at each target size to estimate their probability of success, we  
 142 believed this group average approach was the most valid estimate of success probability. However, Figure  
 143 S8 shows that similar results are observed when probability of success is estimated based on each  
 144 individual's own data (i.e. the probability of success for a participant facing a certain target size was  
 145 estimated using their own success rate over the same target size).  
 146  
 147

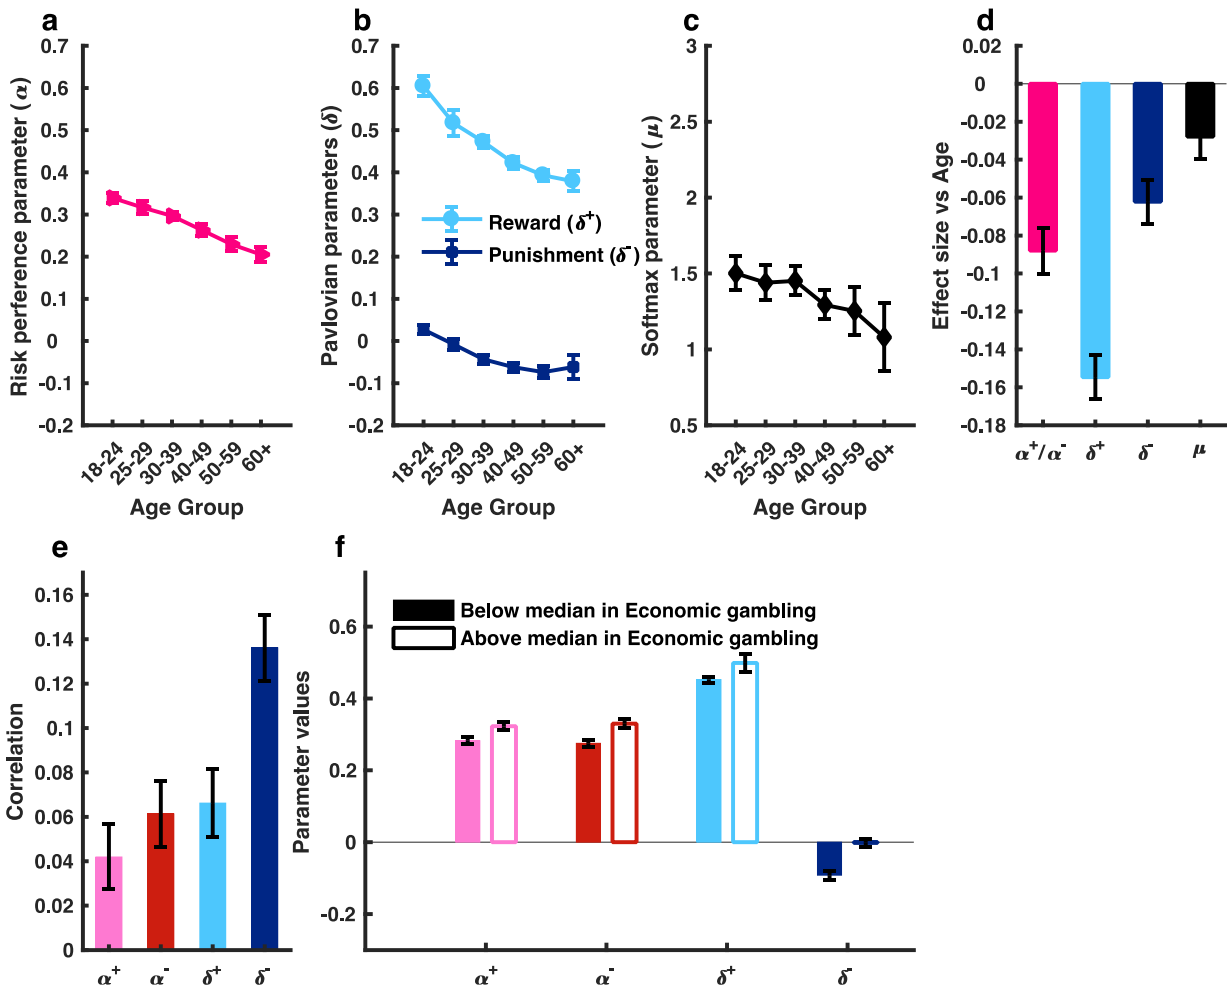

148  
 149  
 150 **Figure S8: Model results when probability of success was based on each individual's own performance**  
 151 **(rather than group average).** Similar results are observed when the probability of success was estimated  
 152 based on each individual's own data. (a)  $\alpha$  across age groups; (b)  $\delta^-$  and  $\delta^+$  across age groups; (c)  $\mu$  across  
 153 age groups; (d) age-related decline across the loss and gain domain. The largest effect size was observed for  
 154 the Pavlovian approach parameter ( $\delta^+$ ); (e) positive correlation across motor and economic decision tasks for  
 155 the main approach-avoidance model parameters; (f) median split. Filled bars denote participants with below-  
 156 median values in the economic gambling task; Hollow bars for above-median. The participants with above-  
 157 median risk parameters and Pavlovian parameters in the economic decision task had higher risk parameters  
 158 and Pavlovian parameters in the motor gambling task. Bars/error bars reflect medians/bootstrapped 95% CIs.  
 159
